# Supplementary material
Source: Springer Nature journal article supplement (https://www.springermedizin.de/resource/supplementary/13063_2014_2353_MOESM1_ESM.pdf/9621900)

# Getting on with Epilepsy

Sheila Hollins, Jane Bernal and Alice Thacker  
Illustrated by Lisa Kopper

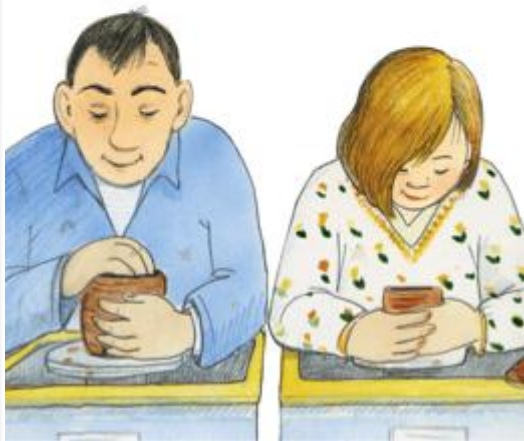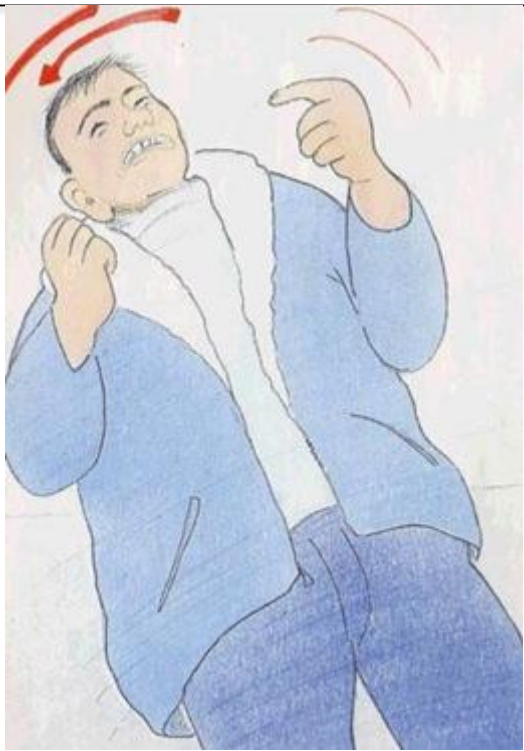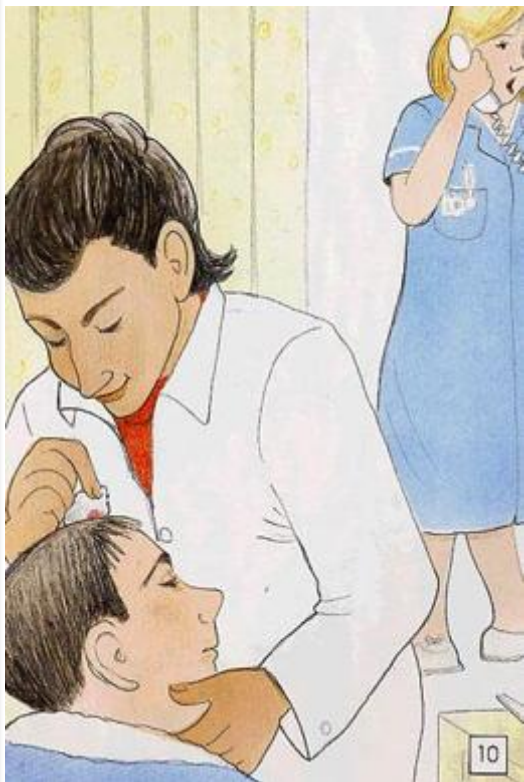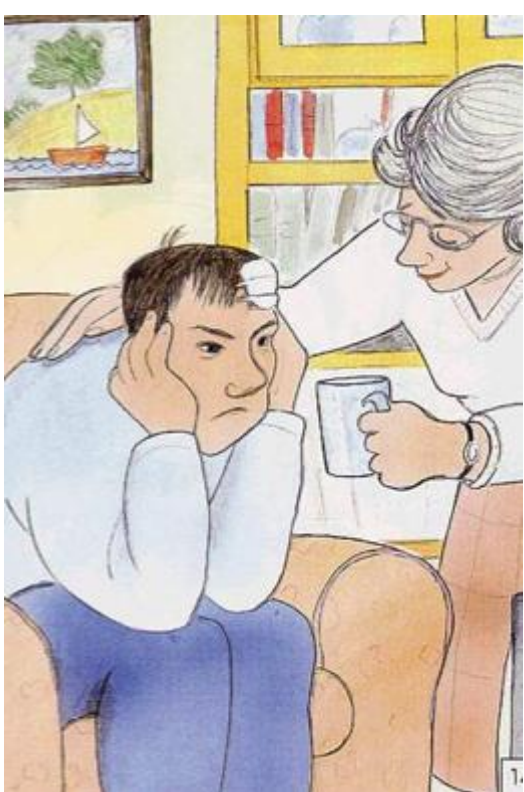

Supplement: MOESM1 [file 9621900]
